# Supplementary material
Source: Springer Nature journal article supplement (https://www.springermedizin.de/resource/supplementary/12970_2007_40_MOESM9_ESM.pdf/9594286)

# Creatine Kinase (IU/L)

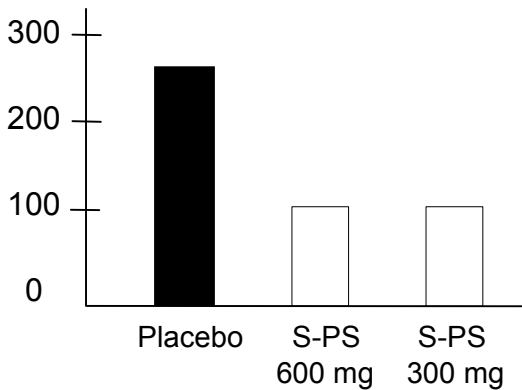

Supplement: MOESM9 [file 9594286]
